# Supplementary material
Source: Elsevier journal article supplement (https://discovery.ucl.ac.uk/1514924/10/mmc2.pdf)
Supplement: mmc2 [file mmc2.pdf]

**SERIAL NUMBERS OF PROSTHETICS/TRACKING STICKERS TO BE ATTACHED OVERLEAF**
